# Supplementary material
Source: PubMed Central journal article supplement (PMC4380128)
Supplement: NIHMS672652-supplement-2.pdf [file NIHMS672652-supplement-2.pdf]

Table S1 PCR primers used in this study

| Name          | Sequence (5' to 3') *          | RE          | Note                                                           |
|---------------|--------------------------------|-------------|----------------------------------------------------------------|
| Gcs1-F        | ATGCTAGAGCTTACATTTTCGTTCC      | -           | amplify the full length DNA and cDNA sequence of <i>PdGcs1</i> |
| Gcs1-R        | ATCACTGCGGACCTTGCCCACCA        | -           |                                                                |
| Gcs1-up-F     | GGGGTACCTCTTTGGAATGGAGGTGATG   | <i>KpnI</i> | amplify the upstream DNA sequence of <i>PdGcs1</i>             |
| Gcs1-up-R     | CGAGCTCAAGAAGAGGCATAGAGGTGG    | <i>SacI</i> |                                                                |
| Gcs1-down-F   | GACTAGTAGTGGCGTACAATTTGCTG     | <i>SpeI</i> | amplify the downstream DNA sequence of <i>PdGcs1</i>           |
| Gcs1-down-R   | CCGCTCGAGTTGATGTTAAGAACGATGCTG | <i>XhoI</i> |                                                                |
| Gcs1-check-F1 | CTGGGAGTTTGCGGTCTA             | -           | amplify the internal fragment of the <i>PdGcs1</i>             |
| Gcs1-check-R1 | CGCTCTTCAATCAGGGTT             | -           |                                                                |
| Gcs1-check-F2 | TGTGAGACATCTTGATTGGGACT        | -           | amplify the upstream DNA sequence of <i>PdGcs1</i> and partial |
| Gcs1-check-R2 | CCGCCTGGACGACTAAACC            | -           | <i>hph</i> gene from $\Delta PdGcs1$ mutant                    |
| Gcs1-SB-F     | ATCCACGATGGCTCAACA             | -           | amplify the upstream DNA sequence of <i>PdGcs1</i> and used as |

|                  |                            |                |                                                                                |
|------------------|----------------------------|----------------|--------------------------------------------------------------------------------|
| Gcs1-SB-R        | AACCTGTCCCAAGATACCG        | -              | a probe for Southern blot                                                      |
| Gcs1-com-F       | GGGGTACCTTTGGAATGGAGGTGATG | <i>KpnI</i>    | amplify the <i>PdGcs1</i> coding region, its upstream and downstream sequences |
| Gcs1-com-R       | CCCAAGCTTGCGAAGCCTACAGTGCC | <i>HindIII</i> |                                                                                |
| Gcs1-qF          | CTACTCGTCGCCCGTTCA         | -              | quantitative analysis of <i>PdGcs1</i> expression                              |
| Gcs1-qR          | AATCACTGCGGACCTTGC         | -              |                                                                                |
| $\beta$ -actin-F | TCCACTACTGCCGAGCGTGAAAT    | -              | amplify the reference gene ( $\beta$ -actin) in qRT-PCR assay                  |
| $\beta$ -actin-R | CCGCCAGACTCAAGACCAAGAAC    | -              |                                                                                |

RE, restriction enzyme

\*Introduced restriction sites are underlined.
